# Supplementary material
Source: Springer Nature journal article supplement (https://www.springermedizin.de/resource/supplementary/13017_2008_112_MOESM2_ESM.pdf/9635584)

1b

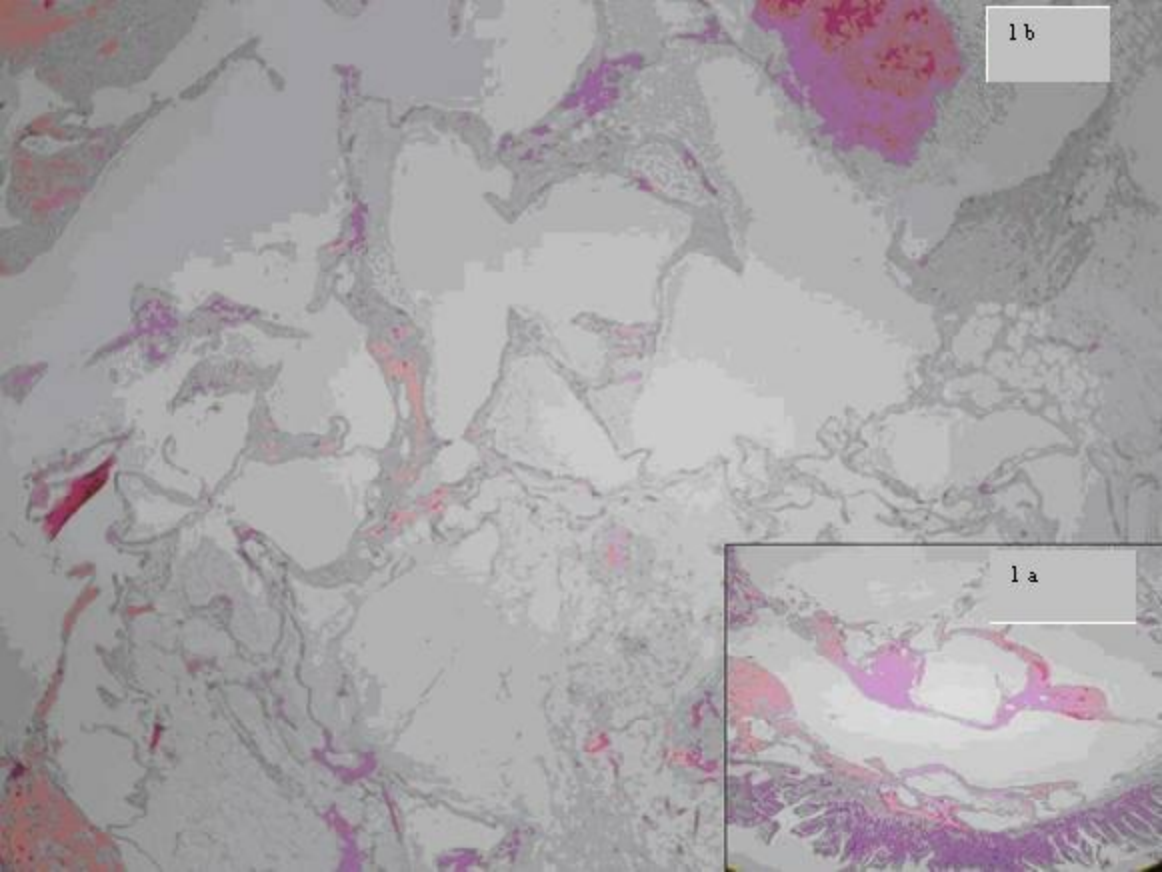

1a

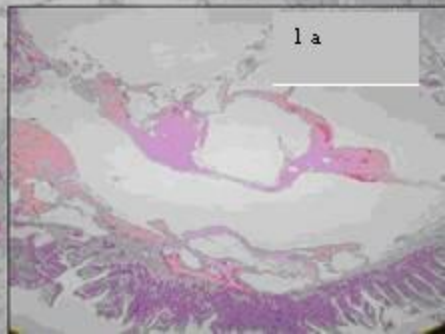

Supplement: MOESM2 [file 9635584]
